# Supplementary material for: Morphological characterization and sexual dimorphism of the antennal sensilla in Bactericera gobica Loginova (Hemiptera: Psyllidae)—a scanning and transmission electron microscopic study
Source: PeerJ. 2022 Feb 15;10:e12888. doi: 10.7717/peerj.12888 (PMC8855716; doi:10.7717/peerj.12888)
Supplement: Supplemental Information 1 [file peerj-10-12888-s001.xlsx]

## Sheet: lengths of each segment
(μm)	scape	pedicel	F1	F2	F3	F4	F5	F6	F7	F8	Total
female		45.78		116.75	123.93	133.37	98.81	80.83	58.88	46.68	827.6
female	41.49		70.23	82.91	110.14	136.25	144.18	98.29	36.13	36.91	862.07
female				106.01	101.08	119.29	128.84	127.28	48.99	47.44	964.07
female	28.4	50.35	207.81	111.29	98.51	112.09	118.33	132.91	51.85	52.53	915.51
female	42.35	31.91	206.56	115.21	116.97		126.18	114.65	39.99	50.55	738.2
female	58.04	46.36	229.72	117.67	122.63	116.7	116.55	89.03	36.74		1127.72
female	63.09	49.71	222.74	126.11	125.92	133.9	138.66		51.85		897.18
female		34.8	159.97	79.61	103.96	103.84		96.44	45.78		974.25
female	59.33	52.7	240.96	117.91	124.9	139.54	145.43	132.61	63.37	50.98	1078.53
female				102.71	99.58	117.55	119.63	115.55	53.98	56.48	1017.93
female	45.37	51.14	202.58	90.75	95.7	125.02	134.12	135.46	44.53	49.58
female	59.09	40.2	205.66	104.12	98.6
female				114.48	123.72	128.48	125.19	141.69	54.13	47.39
female		42.64	197.88	117.59	109.4	131.58	121.39	121.28	55.24	43.46
female	41.5	32.47	244.26	121.12	109.65	140.63	145.27	139.34	54.21	50.07
female		40.11	210.68	118.23	114.15	124.61	141.95	146.97	58.23	56.6
male	8.83	46.57	264.08	139.25	126.33	141.29	125.65	130.23	52.85	50.24	1085.32
male	37.19	20.82	156.26	94.72							894.89
male		45.41	203.8	112.63	90.65	130.47	126.54		122.26	50.67	1076.5
male	60.17	33.45	191.01	95.35	96.76	198.76	114.33	78.17	21.05	30.34	996.93
male	60.96	41.27	225.04	125.46	130.09	110.44	131.31	149.81	46.85	55.27	972.26
male		42.44	215.59	112.31	95.93	169.09	127.89	136.66	52.88	36.52	1031.04
male	34.61	45.72	184.07	76.01	72.88						947.86
male			214.88	111.89	104.57	120.81	143.8	151.81	52.75	44.86	1039.55
male		46.5	243.27	121.58	109.6	140.95	145.63	139.55	53.77	49.44	946.77
male				117.08	117.27	121.23	147.34	151.38	56	46.39	1056.7
male	52.59	39.24	241.93	121.3	117.04	103.39	103.38	130.23	48.24	39.58
male								144.28	53.15	44.55
male	22.23			118.92	106.81	138.16	146.64
male		45.75		129.44	113.41	143.89	164.69	149.25	58.54	49.19
male	57.06	44.05	206.79	119.11			137.86

## Sheet: size of different sensilla
(μm)	ST length	ST basal width	ST apial width	ChS-1 length	ChS-1 basal width	ChS-1 apical width	ChS-2 length	ChS-2 basal width	ChS-2 apical width	SB-1 length	SB-1 basal width	SB-1 apical width	SB-2 length	SB-2 basal width	SB-2 apical width	LAS length	LAS basal width	LAS apical width	SAS length	SAS basal width	SAS apical width	AR-1 length	AR-1 width	AR-2 length	AR-2 width	CvS-1 length	CvS-1 width	CvS-2 length	CvS-2 width	SCA length	SCA width
female	34.77	1.88	0.21				15.1	1.33	0.39	13.58	2.37	1.07	26.27	3.48	1.21	53.47	3.56	0.98	21.49	2.04	0.86	12.14	22.35			1.69	0.5			8.44	7.46
female	27.84	2.53	0.24													52.32	5.77	2.45	10.88	5.83	3.05							2.76	1.3
female	23.19	2.49	0.31				16.94	1.31	0.25							51.41	4.67	1.93	15.74	4.88	2.38					2.19	0.88	1.95	1.14
female	22.2	1.19	0.3				15.59	1.4	0.23				31.95	3.61	0.85	51	4.98	2.14	24.74	5.39	2.68					1.9	1.17	1.92	0.97
female	23.32	1.56	0.49				16.04	1.51	0.8	10.38	2.41	0.93				44.28	5.71	1.81				5.76	10.97
female	21.4	1.65	0.44				13.41	1.65	0.78	13.89	2.25	0.73	27.85	3.06	0.85	46.45	5.26	1.85	7.51		2.79									7.12	7.05
female	14.16	1.15	0.44	38.54	2.07	0.25	15.01	1.5	0.88				33.6	3.9	0.71
female	21.93	1.5	0.39	25.07	1.74	0.31	18.81	1.54	0.85	11.09	2.87	0.86	29.5	2.07	0.84									5.41	9.88	1.25	1.14			7.81	4.99
female	18.69	1.55	0.42							23.95				2.92	0.98	50.12	5.56	2.18	20.03	5.27	3.11	15.39	24.02
female	8.82	1.51	0.4													53.08			18.95	5.84	3.26							2.9	1.46
female	20.42	1.32	0.34	28	1.62	0.42				6.75	2.32	0.99	19.21	2.68	1.33	48.41		2.35	24.64		4.21	24.22	24.89
female	20.98	1.4	0.51	22.13	1.72	0.49
female	19.32	0.5	0.6	22.96	1.65	0.75							34.82			54.62	5.49	4.29	27.55	5.43	1.93
female	21.02	0.34	0.34							9.72			33.3			52.86	5.53	2.04	12.65	5.01	2.56									8.16	6.76
female	30.66	1.64	0.6				8.52									55.09	4.54	2.48	24.23	4.84	2.72							1.46	1.14
female							3.31			26.13						53.86	5.76	2.02	14.48	5.69	3.01	21.48	24.69							9.24	6.54
female	21.55	1.77	0.68				26.66	1.98	0.64													6.38	8.23
female	21.53	1.3	0.22				21.92	2.37	0.53															3.51	4.8
female							30.3	2.28	0.67													11.15	15.9
female							10.77	2.71	1.36
female																						10.66	12.15
female							11.98	2	0.93
female							18.47	2.06	0.51
female																								2.79	2.86
female							30.43
female							21.96																	0.91	2.48
female
female							22.58
female							26.65
female							26.74															9.96	14.82
female							32.07																	1.48	3.13
female							23.19															14.98	21.09
female							29.59	2.3	0.44													5.94	16.69
female							28.14	1.79	0.76
female							21.82	2.74	0.58
female							9.03	2.43	0.94													4.83	6.65
female
female							16.85	1.63	0.6
female							23.94	1.67	0.67
female
female							8.47															10.24	16.51
female							27.75
female																						22.21	28.4
female							19.49
female							18.83
female							23.06															13.18	16.93
female							25.04
female							24.97																24.51
female							13.61	2.05	0.62													14.65	27.07
female							30.3	2.29	0.7														12.04
female							25.88	2.27	0.81
female							10.71	2.13	0.63
female																								16.95	19.15
female							9.94	1.99	0.63													6.61	12.27
female							28	1.97	0.61														20.61
female
female							17.82															16.23	19.1
female							23.64
female																						32.9	41.69
female							9.05															19.01	20.14
female							28.78
female							25.86																20.54
female							28.67																18.98
female							25.26
female							24.18	2.16	0.49
female							12.37	1.61	0.56
female							22.64	2.14	0.59
female							19.01	2.09	1.01
female
female							11.99	2.05	0.67
female							19.37	2.25	0.59
female
female							7.99
female							23.75
female							29.17
female
female							17.94
female							18.22
female							25.59
female
female
female							20	2.13	0.49
female							27.08	2.42	0.68
female							12.25	2.55	0.85
female
female
female							20.61	2.48	0.74
female							30.15
female							22.49
female							25.59
female							25.91
female
female							28.87
female							25.66
female							29.31	2.67	0.62
female
female
female
female							30.92	2.05	0.63
female							20.71
female							24.46	2.16	0.64
female							28.77
female							18.44
female							20.81	1.94	0.59
female							25.27	2.31	0.54
female							20.54
female							30.4
female
female							30.72	2.27	0.36
female							16.9
female							15.9
female							23.97	2.49	0.44
female							24.95
female							23.52
female							49.37	1.63	0.28
female							23.46
female							21.21	2.52	0.7
female
female
female							11.2	1.43	0.44
female							29.6	2.87	0.9
female
female
female
female							25.99	1.62	0.35
female
female
female							21.3	1.67	0.33
female
female
female							23.43	1.83	0.26
female							26.78
female							32.63	2.9	0.43
female							23.66	1.99	0.26
female							29.66
female
female							29.89	2.32	0.47
female
female
female							12.12	1.89	0.43
female							22.99	2.32	0.54
female							18.33	2.13	0.38
female							25.05
female							24.66
female							23.41
female
female							30.42
female							26.54
female							17.37	2.29	0.82
female							11.83	2.2	0.73
female							13.82
female							14.65	1.93	0.77
female							18.32	2.29	0.2
female							21.91
female
female
female							21.78	2.91	0.56
female							15.31
female							13.08	2.17	0.51
female							25.21
female							11.84
female							26.15
female							19.72
female							14.61
female							24.04
female
female
female								1.54	0.36
female							16.39	2.12	0.3
female								2.04	1.01
female
female
female							20.12	1.92	0.53
female
female							15.63	1.48	0.42
female
female
female
female							16.32
female							24.89
female							9.64
female							7.45	1.88	0.62
female							12.42	1.47	0.27
female							15.51	1.3	0.23
female							20	1.87	0.3
female
female
female
female							21.55	1.92	0.4
female							13.91	1.66	0.36
female
female
female							15.35
female
female							16.63
female							20.29
female							15.41
female							2.62	1.68	0.32
female							10.7
female							13.6	1.3	0.28
female							15.12
female							17.49
female							15.75	1.56	0.28
female							7.64
female							15.87
female							12.39
female
female
female							17.26	1.79	0.63
female							16.09	1.64	0.26
female							13.52
female							13.42
female							7.68
female							12.56	1.5	0.51
female
female							12.1	1.03	0.2
female
female
female							13.52	1.27	0.25
female
female
female
female
female
female							15.37	1.47	0.37
female
female
female
female							6.19	1.05	0.2
female							8.49	1.28	0.18
female							10.28	1.24	0.2
female							11.49	1.19	0.32
female
female							8.22	1.35	0.45
female
female
female
female
female
female							12.56
female
female							10.08
female							9.98	1.12
female							6.6		0.21
female							7.98	1.22	0.24
female
female
female							10.45	1.28	0.18
female
female
female							12.34	1.1	0.25
female
female
female
female
female							11.52
female							12.84	1.19	0.41
male	19.29	1.74	0.53	27.55	1.73	0.28	16.94	1.38	0.5				24.18	3.65	1.15	39.11	5.71	2.32	17.71	5.32	2.57	16.04	24.41							6.77	6.47
male	22.75	1.4	0.34				11.86	1.23	0.96
male	26.85	1.48	0.36	31.76	1.21	0.44	16.62	1.3	0.69				20.91	1.79	0.42	51.32	5.48	2.21	22.17	5.57	2.77	8.54	12.04			1.16	0.5	1.38	2.3
male	18.68	1.44	0.45				19.45	1.61	0.75	5.25	2.3	0.88	17.58	3.94	1.1		6.36		11.15	5.94						1.24	1.8
male	20.08	1.4	0.31				16.91	1.34	0.84		3.39	0.67	13.44			48.51	5.68	2	14.23	6.12	2.34							2.48	1.36
male	27.08	1.64	0.44				12.39	1.34	0.7	11.12	2.38	0.93	26.13	3.21	0.99	45.82	5.92	2.24	5.66	5.6	2.37	10.38	17.4							9.29	6.6
male	21.16	1.69	0.28
male	22.01	1.44	0.3	26.96	1.61	0.42																11.61	17.93
male	13.67	1.44	0.53							12.28	2.29	1.06	33.77	5.49	1.15	54.42	5.64	2.7	24.2			16.45	18.03			2.13	1.6	1.09	1.42	8.21	7.05
male	28.83	1.45	0.51													45.05	5.95	2.26	18.93	5.67	3					1.84	1.12	1.07	1.41	5.07	6.94
male										9.94		0.77	23.86	3.46	0.85	50.72	5.84	1.89		5.17	2.5	6.4	15.06
male	24.44	1.57	0.37							13.64	2.52	0.87	28.46	2.68	0.92	50.32	6.27	2.24	16.9	5.09				1.64	9.35					10.09	7.2
male													31.49	3.31	1.18		5.48	2.22		5.15	2.51			1.4	7.8	1.23	0.69
male																54.29			21.67
male							12.03	1.82	0.7	29.24				2.99	0.84		5.61	2.26		5.73	2.98							1.7	1.13
male	22.84	1.35	0.49																											6.43	4.2
male							28.78	2.09	0.63
male							27.16	2.2	0.57
male							23.64	2.21	0.59														24.03
male							16.86
male
male							10.33	1.82	0.56															3.37	4.85
male							24.52															7.64	9.4
male							28.71	2.16	0.84													9.79	13.5
male
male							16.08															15.99	5.91
male																						7.76	9.79
male							25.43															10.87	7.82
male																						10.03
male							20.97															15.63	29.15
male							26.76	2.67	0.84
male																						9.66	15.71
male							23.32	2.11	0.71													8.34	11.01
male							16.1	2.79	0.8													6.91	10.64
male							19.03	1.89	0.61													10.33	17.88
male							17.09
male
male							11.91	2.42	0.5														11.64
male							25.99
male							21.29	2.04	0.95
male
male							22.94
male
male							26.05																4.29	3.77
male																								2.74	3.73
male							16.28															13.78	34.09
male							21.89	1.9	0.62
male							29.1
male							33.52	2.32	0.71															13.75	16.7
male							13.35	2.42	0.59													19.55	22.53
male							25.05	2.02	0.73													6.34	10.15
male							20.63
male																						16.9	11.61
male							20.71	2.41	0.7													10.35	24.79
male							28.11																19.43
male							30.31	2.22	1.13
male
male							12.56
male																								4.08	12.99
male							25.53
male																								10.95	17.16
male							22.2
male							27.08	2.82	0.81
male							24.6
male							26.42	2.42	0.7
male							29.51	2.49	0.7
male							23.66	2.48	0.84
male							21.66
male
male							22.38	2.09	1.01
male							28.3
male							20.35	2.05	0.89
male							28.38	2.34	0.89
male							19.26
male
male							23.1	2.63	0.95
male							24.07	2.13	0.63
male							15.61
male
male
male							16.25
male							31.72	2.33	0.86
male
male
male
male
male
male							25.71
male
male
male
male							16.55	2.16	0.66
male								2.28	0.68
male
male
male
male
male
male
male
male							20.99	2.17	0.4
male							22.11
male							23.3
male							29.19	2.25	0.3
male							16.78	2	0.53
male							10.18	2.5	0.61
male
male							19.11	2.14	0.48
male							21.61
male							23.2	2.17	0.53
male							16.12	2.08	0.55
male							26.51
male
male							18.15
male							29.61
male							21.42
male							25.14	2.16	0.37
male
male
male							22.46	1.89	0.23
male							21.07	2.19	0.6
male							6.41
male
male							20.6	2.34	0.39
male
male							23.75	2.41	0.54
male							24.74	2.42	0.5
male
male
male
male
male
male							27.04	2.27	0.31
male
male							14.43	2.51	0.52
male							27.64	1.74	0.57
male							23.07	2.12	0.32
male
male
male							20.6	2.14	0.65
male
male							30.28	2.61	0.62
male							28.8
male
male
male							14.19
male							33.22
male
male							17.03	3	0.54
male
male							21.22	1.39	0.3
male							16.59	1.56	0.26
male							18.93	1.9	0.4
male							22.79	2.27	0.37
male
male
male							25.36	1.99	0.37
male							20.55	1.99	0.4
male							22.52	2.8	0.42
male							20.58	2.31	0.77
male
male							14.47
male							22.74
male							21.93
male							24.08	2.03	0.47
male
male								1.49
male							22	2.23	0.3
male							11.02	2.04	0.38
male
male
male
male							23.45	2.01	0.41
male							18.28	2.22	0.54
male							25.12	2.3	0.72
male									0.51
male
male
male							17.19
male							12.8
male							12.81	1.25	0.18
male
male							11.26	1.47	0.24
male							20.57
male							14.16
male
male
male
male							11.66	1.49	0.52
male							16.7	2.38	0.57
male							27.47	1.68	0.38
male
male							19.35
male
male							19.52
male							17.41
male							14.59	2.3	0.61
male
male
male							9.15	1.33	0.37
male							11.52	1.59	0.16
male							15.55	1.54	0.33
male
male
male							20.59	20.32	4.77
male							13.42	1.46	0.26
male							17.13	1.6	0.26
male							4.29	1.43	0.29
male							17.42
male
male							17.95
male							19.11
male
male
male
male							15.04	2.48	0.45
male
male
male
male
male
male							19.96	1.96	0.35
male							16.11	1.03	0.12
male
male
male							18.26
male							18.33	1.55	0.17
male							13.89	1.41	0.37
male
male							12.72	1.33	0.27
male
male							8.34	1.03	0.3
male
male
male
male
male							9.42	1.26	0.45
male
male							11.26	1.16	0.16
male							10.4	1.2	0.23
male							13.59	1.3	0.23
male
male							11.06	1.22	0.16
male							6.14	1.21	0.31
male							9.38	0.75	0.26
male
male
male
male
male							12.92	1.3	0.28
male							11.66	1.47	0.39

## Sheet: size of sensilla chaetica
(μm)	length on scape	basal width on scape	apical width on scape	length on pedicel	basal width on pedicel	apical width on pedicel	length on F1	basal width on F1	apical width on F1	length on F2	basal width on F2	apical width on F2	length on F3	basal width on F3	apical width on F3	length on F4	basal width on F4	apical width on F4	length on F5	basal width on F5	apical width on F5	length on F6	basal width on F6	apical width on F6	length on F7	basal width on F7	apical width on F7	length on F8	basal width on F8	apical width on F8
female				15.1	1.33	0.39	9.98	1.12					15.41			9.64			17.37	2.29	0.82	32.63	2.9	0.43	24.46	2.16	0.64	8.52
female							6.6		0.21	6.19	1.05	0.2	2.62	1.68	0.32	7.45	1.88	0.62	11.83	2.2	0.73	23.66	1.99	0.26	28.77			3.31
female				16.94	1.31	0.25	7.98	1.22	0.24	8.49	1.28	0.18	10.7			12.42	1.47	0.27	13.82			29.66			18.44			26.66	1.98	0.64
female				15.59	1.4	0.23				10.28	1.24	0.2	13.6	1.3	0.28	15.51	1.3	0.23	14.65	1.93	0.77				20.81	1.94	0.59	21.92	2.37	0.53
female				16.04	1.51	0.8				11.49	1.19	0.32	15.12			20	1.87	0.3	18.32	2.29	0.2	29.89	2.32	0.47	25.27	2.31	0.54	30.3	2.28	0.67
female				13.41	1.65	0.78	10.45	1.28	0.18				17.49						21.91						20.54			10.77	2.71	1.36
female	38.54	2.07	0.25	15.01	1.5	0.88				8.22	1.35	0.45	15.75	1.56	0.28										30.4
female	25.07	1.74	0.31	18.81	1.54	0.85							7.64									12.12	1.89	0.43				11.98	2	0.93
female							12.34	1.1	0.25				15.87			21.55	1.92	0.4	21.78	2.91	0.56	22.99	2.32	0.54	30.72	2.27	0.36	18.47	2.06	0.51
female													12.39			13.91	1.66	0.36	15.31			18.33	2.13	0.38	16.9
female	28	1.62	0.42																13.08	2.17	0.51	25.05			15.9			30.43
female	22.13	1.72	0.49																25.21			24.66			23.97	2.49	0.44	21.96
female	22.96	1.65	0.75							12.56			17.26	1.79	0.63	15.35			11.84			23.41			24.95
female							11.52						16.09	1.64	0.26				26.15						23.52			22.58
female							12.84	1.19	0.41	10.08			13.52			16.63			19.72			30.42			49.37	1.63	0.28	26.65
female													13.42			20.29			14.61			26.54			23.46			26.74
female													7.68						24.04						21.21	2.52	0.7	32.07
female													12.56	1.5	0.51													23.19
female																												29.59	2.3	0.44
female													12.1	1.03	0.2					1.54	0.36				11.2	1.43	0.44	28.14	1.79	0.76
female																			16.39	2.12	0.3				29.6	2.87	0.9	21.82	2.74	0.58
female																				2.04	1.01							9.03	2.43	0.94
female													13.52	1.27	0.25
female																												16.85	1.63	0.6
female																			20.12	1.92	0.53				25.99	1.62	0.35	23.94	1.67	0.67
female
female																			15.63	1.48	0.42							8.47
female																									21.3	1.67	0.33	27.75
female													15.37	1.47	0.37
female																												19.49
female																			16.32						23.43	1.83	0.26	18.83
female																			24.89									23.06
female																												25.04
female																												24.97
female																												13.61	2.05	0.62
female																												30.3	2.29	0.7
female																												25.88	2.27	0.81
female																												10.71	2.13	0.63
female
female																												9.94	1.99	0.63
female																												28	1.97	0.61
female
female																												17.82
female																												23.64
female
female																												9.05
female																												28.78
female																												25.86
female																												28.67
female																												25.26
female																												24.18	2.16	0.49
female																												12.37	1.61	0.56
female																												22.64	2.14	0.59
female																												19.01	2.09	1.01
female
female																												11.99	2.05	0.67
female																												19.37	2.25	0.59
female
female																												7.99
female																												23.75
female																												29.17
female
female																												17.94
female																												18.22
female																												25.59
female
female
female																												20	2.13	0.49
female																												27.08	2.42	0.68
female																												12.25	2.55	0.85
female
female
female																												20.61	2.48	0.74
female																												30.15
female																												22.49
female																												25.59
female																												25.91
female
female																												28.87
female																												25.66
female																												29.31	2.67	0.62
female
female
female
female																												30.92	2.05	0.63
female																												20.71
male	27.55	1.73	0.28	16.94	1.38	0.5	11.06	1.22	0.16																			12.03	1.82	0.7
male				11.86	1.23	0.96	6.14	1.21	0.31	13.89	1.41	0.37	14.59	2.3	0.61	12.81	1.25	0.18	17.03	3	0.54	27.04	2.27	0.31	20.99	2.17	0.4
male	31.76	1.21	0.44	16.62	1.3	0.69	9.38	0.75	0.26																22.11			28.78	2.09	0.63
male				19.45	1.61	0.75				12.72	1.33	0.27				11.26	1.47	0.24	21.22	1.39	0.3	14.43	2.51	0.52	23.3			27.16	2.2	0.57
male				16.91	1.34	0.84							9.15	1.33	0.37	20.57			16.59	1.56	0.26	27.64	1.74	0.57	29.19	2.25	0.3	23.64	2.21	0.59
male				12.39	1.34	0.7				8.34	1.03	0.3	11.52	1.59	0.16	14.16			18.93	1.9	0.4	23.07	2.12	0.32	16.78	2	0.53	16.86
male													15.55	1.54	0.33				22.79	2.27	0.37				10.18	2.5	0.61
male	26.96	1.61	0.42				12.92	1.3	0.28																			10.33	1.82	0.56
male							11.66	1.47	0.39													20.6	2.14	0.65	19.11	2.14	0.48	24.52
male													20.59	20.32	4.77	11.66	1.49	0.52	25.36	1.99	0.37				21.61			28.71	2.16	0.84
male										9.42	1.26	0.45	13.42	1.46	0.26	16.7	2.38	0.57	20.55	1.99	0.4	30.28	2.61	0.62	23.2	2.17	0.53
male													17.13	1.6	0.26	27.47	1.68	0.38	22.52	2.8	0.42	28.8			16.12	2.08	0.55	16.08
male										11.26	1.16	0.16	4.29	1.43	0.29				20.58	2.31	0.77				26.51
male										10.4	1.2	0.23	17.42			19.35												25.43
male										13.59	1.3	0.23							14.47			14.19			18.15
male													17.95			19.52			22.74			33.22			29.61			20.97
male													19.11			17.41			21.93						21.42			26.76	2.67	0.84
male																			24.08	2.03	0.47				25.14	2.16	0.37
male																												23.32	2.11	0.71
male																				1.49								16.1	2.79	0.8
male													15.04	2.48	0.45				22	2.23	0.3				22.46	1.89	0.23	19.03	1.89	0.61
male																			11.02	2.04	0.38				21.07	2.19	0.6	17.09
male																									6.41
male																												11.91	2.42	0.5
male																									20.6	2.34	0.39	25.99
male																			23.45	2.01	0.41							21.29	2.04	0.95
male													19.96	1.96	0.35				18.28	2.22	0.54				23.75	2.41	0.54
male													16.11	1.03	0.12				25.12	2.3	0.72				24.74	2.42	0.5	22.94
male																					0.51
male																												26.05
male													18.26
male													18.33	1.55	0.17				17.19									16.28
male																			12.8									21.89	1.9	0.62
male																												29.1
male																												33.52	2.32	0.71
male																												13.35	2.42	0.59
male																												25.05	2.02	0.73
male																												20.63
male
male																												20.71	2.41	0.7
male																												28.11
male																												30.31	2.22	1.13
male
male																												12.56
male
male																												25.53
male
male																												22.2
male																												27.08	2.82	0.81
male																												24.6
male																												26.42	2.42	0.7
male																												29.51	2.49	0.7
male																												23.66	2.48	0.84
male																												21.66
male
male																												22.38	2.09	1.01
male																												28.3
male																												20.35	2.05	0.89
male																												28.38	2.34	0.89
male																												19.26
male
male																												23.1	2.63	0.95
male																												24.07	2.13	0.63
male																												15.61
male
male
male																												16.25
male																												31.72	2.33	0.86
male
male
male
male
male
male																												25.71
male
male
male
male																												16.55	2.16	0.66
male																													2.28	0.68
